# Supplementary material for: Specific biomarkers for stochastic division patterns and starvation-induced quiescence under limited glucose levels in fission yeast
Source: PubMed Central journal article supplement (PMC3123465; doi:10.1111/j.1742-4658.2011.08050.x), 2011-04
Supplement: febs0278-1299-SD1.pdf [file febs0278-1299-SD1.pdf]

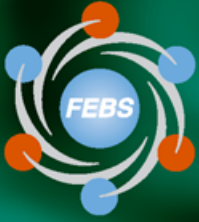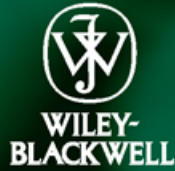

the **FEBS**  
Journal

[www.febsjournal.org](http://www.febsjournal.org)

# **Specific biomarkers for stochastic division patterns and starvation-induced quiescence under limited glucose levels in fission yeast**

Tomáš Pluskal, Takeshi Hayashi, Shigeaki Saitoh, Asuka Fujisawa and Mitsuhiro Yanagida

DOI: 10.1111/j.1742-4658.2010.08050

30°C

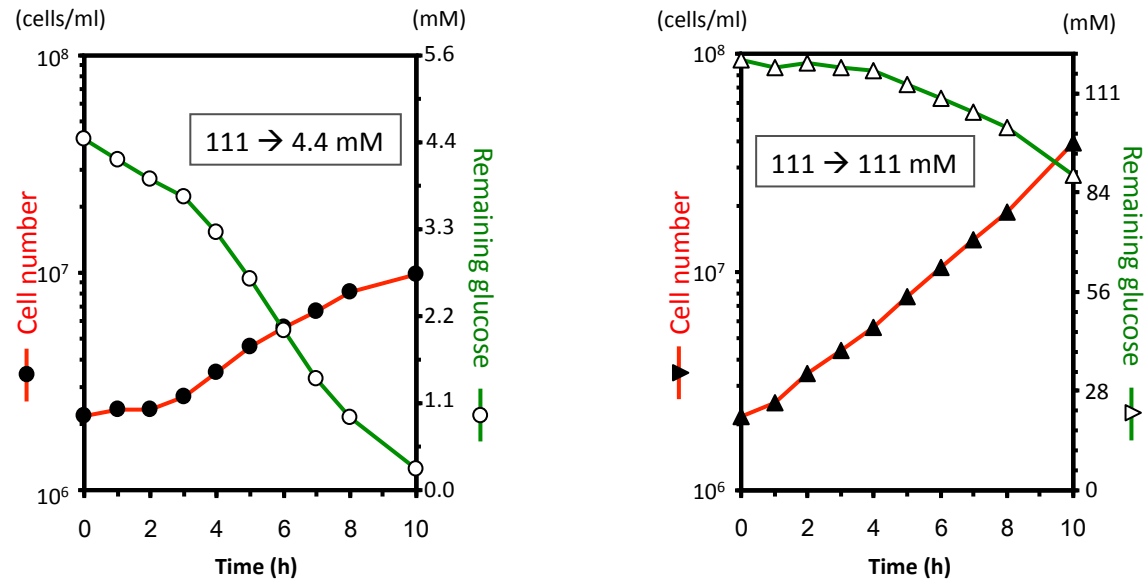

**Figure S1.** Cell behavior of *S. pombe* under limited glucose concentrations at 30°C  
Cells cultured in standard medium containing 111 mM glucose were shifted to medium containing 4.4 mM glucose (left panel) or to control culture containing the same 111 mM glucose (right panel). The cell number increased and the glucose level remaining in the liquid culture were measured at 30°C for 10 h.



| Ionization mode | m/z     | Retention time (min) | Compound                   | Normalized peak area after switch to 0 mM glucose |          |          |          |          |          |         |         |         |         |         |         |         |         |         |
|-----------------|---------|----------------------|----------------------------|---------------------------------------------------|----------|----------|----------|----------|----------|---------|---------|---------|---------|---------|---------|---------|---------|---------|
|                 |         |                      |                            | 0 min #1                                          | 0 min #2 | 0 min #3 | 5 min #1 | 5 min #2 | 5 min #3 | 2 h #1  | 2 h #2  | 2 h #3  | 4 h #1  | 4 h #2  | 4 h #3  | 8 h #1  | 8 h #2  | 8 h #3  |
| Positive        | 810.126 | 10.5                 | Acetyl-CoA                 | 1.44                                              | 3.38     | 4.27     | 0.21     | 0.31     | 0.37     | 0.16    | 0.10    | 0.14    | 0.39    | 0.24    | 0.23    | 0.05    | 0.03    | 0.04    |
| Positive        | 268.102 | 6.6                  | Adenosine                  | 1.00                                              | 1.22     | 1.31     | 12.54    | 15.65    | 10.23    | 40.92   | 44.70   | 49.13   | 92.91   | 90.42   | 113.65  | 91.01   | 79.82   | 71.46   |
| Negative        | 426.023 | 12.7                 | ADP                        | 75.36                                             | 67.26    | 61.65    | 111.09   | 90.63    | 108.46   | 55.09   | 26.03   | 34.29   | 14.66   | 11.91   | 6.04    | 9.99    | 8.27    | 9.51    |
| Negative        | 346.056 | 11.4                 | AMP                        | 40.70                                             | 56.32    | 56.28    | 392.68   | 331.23   | 332.33   | 356.80  | 294.28  | 357.38  | 334.62  | 289.45  | 220.61  | 157.42  | 151.17  | 170.84  |
| Negative        | 505.990 | 13.9                 | ATP                        | 402.61                                            | 366.04   | 400.51   | 175.80   | 131.84   | 146.07   | 28.77   | 10.31   | 9.88    | 2.42    | 1.59    | 0.75    | 1.79    | 1.43    | 1.13    |
| Positive        | 245.094 | 6.2                  | Biotin                     | 11.93                                             | 13.05    | 16.66    | 13.38    | 17.19    | 8.10     | 0.28    | 0.27    | 0.37    | 0.14    | 0.15    | 0.22    | 0.11    | 0.11    | 0.11    |
| Positive        | 489.110 | 13.0                 | CDP-choline                | 1.19                                              | 1.46     | 1.61     | 51.94    | 39.70    | 38.10    | 235.74  | 261.90  | 207.33  | 291.39  | 214.39  | 218.53  | 218.06  | 201.91  | 175.36  |
| Positive        | 447.064 | 13.8                 | CDP-ethanolamine           | 0.32                                              | 0.40     | 0.38     | 1.81     | 1.77     | 1.30     | 8.66    | 8.76    | 7.65    | 8.30    | 8.00    | 8.66    | 10.12   | 8.99    | 7.41    |
| Negative        | 481.979 | 15.6                 | CTP                        | 26.76                                             | 23.35    | 28.24    | 5.43     | 4.32     | 5.61     | 0.40    | 0.10    | 0.09    | 0.00    | 0.00    | 0.00    | 0.00    | 0.00    | 0.00    |
| Positive        | 203.149 | 20.7                 | Dimethyl arginine          | 3.31                                              | 4.85     | 4.42     | 4.93     | 4.87     | 2.85     | 4.97    | 4.73    | 5.35    | 3.83    | 4.32    | 5.28    | 4.51    | 4.13    | 4.09    |
| Positive        | 312.128 | 10.0                 | Dimethyl guanosine         | 56.18                                             | 60.55    | 49.86    | 100.92   | 92.94    | 81.63    | 75.57   | 86.36   | 81.91   | 56.94   | 63.50   | 77.60   | 55.64   | 55.68   | 49.60   |
| Positive        | 184.107 | 9.7                  | Dimethyl histidine         | 9.14                                              | 12.86    | 14.21    | 17.83    | 19.63    | 8.00     | 13.48   | 14.41   | 15.99   | 12.71   | 8.34    | 12.92   | 11.27   | 10.33   | 9.93    |
| Positive        | 175.143 | 19.7                 | Dimethyl lysine            | 1.16                                              | 2.11     | 1.95     | 2.25     | 1.85     | 1.13     | 1.99    | 1.56    | 1.76    | 1.24    | 1.28    | 1.99    | 1.70    | 1.69    | 1.49    |
| Positive        | 741.231 | 4.9                  | Ferrichrome                | 25.15                                             | 29.29    | 25.33    | 28.56    | 21.03    | 27.97    | 23.84   | 23.73   | 18.40   | 16.40   | 12.83   | 6.64    | 4.91    | 2.46    | 1.51    |
| Negative        | 338.989 | 15.9                 | Fructose-1-6-diphosphate   | 558.28                                            | 597.13   | 695.08   | 21.65    | 16.86    | 18.43    | 0.27    | 0.04    | 0.05    | 0.01    | 0.02    | 0.00    | 0.00    | 0.00    | 0.00    |
| Negative        | 259.023 | 13.4                 | Fructose-6-phosphate       | 90.17                                             | 98.17    | 105.04   | 3.73     | 2.04     | 2.17     | 0.37    | 0.12    | 0.15    | 0.06    | 0.05    | 0.03    | 0.04    | 0.04    | 0.02    |
| Positive        | 606.080 | 15.4                 | GDP-glucose                | 17.53                                             | 19.71    | 19.12    | 1.07     | 0.80     | 0.82     | 0.10    | 0.09    | 0.11    | 0.08    | 0.07    | 0.05    | 0.03    | 0.05    | 0.05    |
| Negative        | 259.023 | 14.4                 | Glucose-6-phosphate        | 147.30                                            | 135.02   | 176.10   | 16.59    | 14.31    | 6.23     | 5.24    | 2.39    | 2.48    | 0.47    | 0.45    | 0.25    | 0.29    | 0.31    | 0.26    |
| Negative        | 306.077 | 11.9                 | Glutathione (GSH)          | 1.30                                              | 216.99   | 247.99   | 67.76    | 232.26   | 1.28     | 35.82   | 49.36   | 71.98   | 0.08    | 2.92    | 0.40    | 0.02    | 0.02    | 0.06    |
| Negative        | 611.147 | 15.0                 | Glutathione (GSSG)         | 228.37                                            | 197.44   | 234.08   | 334.90   | 222.06   | 265.72   | 283.54  | 113.77  | 132.71  | 146.33  | 120.89  | 50.11   | 84.09   | 77.38   | 61.78   |
| Positive        | 258.108 | 12.3                 | Glycerophosphocholine      | 936.50                                            | 1206.28  | 1359.65  | 1051.68  | 961.02   | 922.06   | 1292.94 | 1199.60 | 1162.21 | 1377.72 | 1070.38 | 1335.97 | 1652.03 | 1501.60 | 1277.62 |
| Negative        | 214.049 | 13.1                 | Glycerophosphoethanolamine | 7.81                                              | 10.11    | 14.81    | 3.60     | 4.10     | 3.55     | 36.94   | 14.01   | 21.88   | 30.73   | 20.88   | 19.18   | 24.07   | 26.47   | 36.00   |
| Negative        | 333.059 | 13.6                 | Glycerophosphoinositol     | 10.06                                             | 12.67    | 15.15    | 12.66    | 10.09    | 9.74     | 15.40   | 7.89    | 10.14   | 13.93   | 11.07   | 8.80    | 20.00   | 16.99   | 17.77   |
| Negative        | 521.985 | 16.4                 | GTP                        | 107.05                                            | 110.05   | 102.80   | 55.52    | 43.37    | 52.33    | 17.33   | 6.98    | 7.73    | 1.45    | 1.19    | 0.29    | 0.23    | 0.26    | 0.10    |
| Negative        | 267.073 | 8.4                  | Inosine                    | 24.81                                             | 24.96    | 33.19    | 38.12    | 39.84    | 30.17    | 48.96   | 43.75   | 58.91   | 42.78   | 36.79   | 45.80   | 23.33   | 25.05   | 23.12   |
| Positive        | 282.117 | 12.5                 | Methyl adenosine           | 6.49                                              | 5.68     | 6.37     | 13.07    | 11.89    | 8.65     | 9.61    | 9.61    | 9.67    | 6.16    | 3.29    | 8.72    | 4.68    | 4.53    | 3.52    |
| Positive        | 298.112 | 7.1                  | Methyl guanosine           | 3.62                                              | 10.20    | 4.75     | 9.38     | 10.33    | 5.55     | 9.07    | 9.58    | 8.83    | 7.08    | 7.80    | 8.11    | 6.65    | 6.10    | 5.14    |
| Positive        | 170.091 | 10.8                 | Methyl histidine           | 2.67                                              | 2.90     | 3.31     | 3.01     | 2.98     | 2.22     | 3.29    | 3.48    | 3.41    | 3.39    | 3.78    | 4.32    | 5.22    | 4.79    | 4.65    |
| Positive        | 664.111 | 11.9                 | NAD+                       | 382.44                                            | 381.85   | 381.68   | 487.52   | 412.15   | 409.79   | 448.58  | 464.05  | 410.08  | 509.21  | 358.07  | 464.64  | 540.06  | 487.90  | 386.50  |
| Positive        | 744.076 | 14.4                 | NADP+                      | 21.25                                             | 23.01    | 21.71    | 40.30    | 34.22    | 33.48    | 27.37   | 32.63   | 30.99   | 11.10   | 9.70    | 10.85   | 4.75    | 4.43    | 4.26    |
| Negative        | 184.986 | 14.4                 | Phospho-glyceric acid      | 304.50                                            | 263.68   | 289.62   | 55.55    | 35.26    | 41.34    | 4.30    | 1.52    | 1.55    | 0.90    | 0.62    | 0.36    | 0.62    | 0.43    | 0.40    |
| Negative        | 166.976 | 15.0                 | Phosphoenolpyruvate        | 64.98                                             | 54.36    | 66.90    | 13.70    | 9.80     | 11.93    | 0.59    | 0.29    | 0.28    | 0.07    | 0.02    | 0.02    | 0.15    | 0.13    | 0.07    |
| Positive        | 385.126 | 11.2                 | S-adenosyl-homocysteine    | 46.92                                             | 54.35    | 53.62    | 67.87    | 63.70    | 52.72    | 126.57  | 141.33  | 111.06  | 138.61  | 133.61  | 137.73  | 146.99  | 148.52  | 109.14  |
| Positive        | 399.142 | 14.4                 | S-adenosyl-methionine      | 11.42                                             | 9.63     | 9.76     | 11.82    | 9.11     | 7.98     | 4.55    | 6.25    | 3.73    | 1.56    | 1.54    | 1.48    | 0.95    | 0.93    | 0.60    |
| Negative        | 341.109 | 13.6                 | Trehalose                  | 9.63                                              | 8.54     | 10.71    | 5.62     | 4.67     | 4.64     | 1.37    | 0.84    | 0.55    | 1.05    | 0.69    | 0.62    | 1.88    | 1.48    | 1.20    |
| Positive        | 198.122 | 10.0                 | Trimethyl histidine        | 3.81                                              | 3.68     | 3.81     | 3.78     | 4.24     | 2.23     | 2.36    | 2.80    | 2.82    | 2.06    | 2.10    | 2.16    | 1.94    | 1.93    | 1.67    |
| Positive        | 189.158 | 21.1                 | Trimethyl lysine           | 1.70                                              | 2.83     | 2.48     | 2.77     | 2.80     | 1.30     | 2.09    | 2.12    | 2.19    | 1.47    | 1.83    | 1.96    | 1.36    | 1.41    | 1.36    |
| Negative        | 606.076 | 12.7                 | UDP-acetyl-glucosamine     | 10.80                                             | 12.92    | 12.98    | 15.35    | 10.77    | 15.07    | 10.24   | 4.61    | 8.26    | 1.07    | 0.62    | 0.49    | 0.55    | 0.34    | 0.52    |
| Negative        | 565.050 | 13.8                 | UDP-glucose                | 358.57                                            | 345.84   | 350.98   | 9.59     | 4.55     | 7.59     | 0.11    | 0.02    | 0.01    | 0.02    | 0.00    | 0.00    | 0.01    | 0.00    | 0.00    |
| Negative        | 482.963 | 15.1                 | UTP                        | 94.24                                             | 109.17   | 122.69   | 87.82    | 77.82    | 82.56    | 9.63    | 3.81    | 4.12    | 0.18    | 0.17    | 0.03    | 0.03    | 0.01    | 0.00    |
| Negative        | 283.068 | 9.4                  | Xanthosine                 | 4.74                                              | 5.19     | 5.08     | 7.06     | 5.83     | 4.42     | 5.35    | 4.75    | 5.64    | 9.17    | 9.45    | 9.95    | 14.13   | 14.65   | 15.07   |

**Table S2** The time-course change in peak areas of metabolites under glucose fasting. *S. pombe* cells grown at 26°C in medium containing 111 mM glucose were transferred to medium not containing glucose (fasting condition). Metabolites were extracted at the indicated times, three samples at each time point.

| Ionization mode | m/z     | Retention time (min) | Compound                   | Normalized peak area after switch to 1.1 mM glucose |          |          |           |           |           |         |         |         |         |         |         |         |         |         |         |         |         |         |         |         |
|-----------------|---------|----------------------|----------------------------|-----------------------------------------------------|----------|----------|-----------|-----------|-----------|---------|---------|---------|---------|---------|---------|---------|---------|---------|---------|---------|---------|---------|---------|---------|
|                 |         |                      |                            | 0 min #1                                            | 0 min #2 | 0 min #3 | 30 min #1 | 30 min #2 | 30 min #3 | 1 h #1  | 1 h #2  | 1 h #3  | 4 h #1  | 4 h #2  | 4 h #3  | 1 d #1  | 1 d #2  | 1 d #3  | 2 d #1  | 2 d #2  | 2 d #3  | 7 d #1  | 7 d #2  | 7 d #3  |
| Positive        | 810.126 | 10.6                 | Acetyl-CoA                 | 1.44                                                | 3.38     | 4.27     | 0.01      | 0.00      | 0.00      | 0.03    | 0.00    | 0.05    | 0.00    | 0.00    | 0.00    | 0.00    | 0.00    | 0.00    | 0.00    | 0.00    | 0.01    | 0.00    | 0.00    |         |
| Positive        | 268.102 | 6.6                  | Adenosine                  | 1.00                                                | 1.22     | 1.31     | 15.93     | 5.39      | 8.87      | 3.83    | 4.15    | 9.37    | 1.13    | 1.36    | 0.89    | 2.01    | 2.38    | 1.34    | 2.78    | 3.22    | 1.97    | 12.08   | 3.99    | 5.40    |
| Negative        | 426.023 | 12.7                 | ADP                        | 75.36                                               | 67.27    | 61.66    | 186.37    | 107.18    | 124.51    | 163.46  | 117.98  | 95.39   | 180.55  | 133.50  | 70.77   | 230.55  | 134.74  | 281.86  | 223.39  | 153.50  | 190.59  | 123.61  | 86.07   | 83.33   |
| Negative        | 346.057 | 11.4                 | AMP                        | 40.71                                               | 56.35    | 56.30    | 138.34    | 149.36    | 159.56    | 103.17  | 162.44  | 137.05  | 141.17  | 167.73  | 100.12  | 393.07  | 335.92  | 220.35  | 529.79  | 570.63  | 437.58  | 373.10  | 310.83  | 359.25  |
| Negative        | 505.991 | 13.9                 | ATP                        | 402.65                                              | 366.11   | 400.56   | 367.60    | 262.99    | 328.55    | 298.87  | 292.20  | 227.44  | 186.67  | 154.75  | 137.41  | 228.86  | 105.16  | 180.31  | 97.09   | 69.66   | 85.07   | 23.77   | 26.47   | 29.89   |
| Positive        | 245.093 | 6.2                  | Biotin                     | 11.93                                               | 13.05    | 16.66    | 6.31      | 6.62      | 8.82      | 4.83    | 6.40    | 6.16    | 1.19    | 1.71    | 1.18    | 2.48    | 1.77    | 2.52    | 0.14    | 0.09    | 0.12    | 0.01    | 0.00    | 0.00    |
| Positive        | 489.109 | 13.0                 | CDP-choline                | 1.19                                                | 1.46     | 1.61     | 17.74     | 33.35     | 38.29     | 15.69   | 20.54   | 19.03   | 28.28   | 51.69   | 23.16   | 211.26  | 240.87  | 293.17  | 884.13  | 779.81  | 745.16  | 696.08  | 717.69  | 1094.92 |
| Positive        | 447.063 | 13.8                 | CDP-ethanolamine           | 0.32                                                | 0.41     | 0.38     | 1.16      | 1.82      | 2.10      | 0.83    | 0.83    | 1.11    | 0.58    | 0.82    | 0.54    | 34.88   | 35.92   | 35.00   | 67.53   | 76.01   | 48.56   | 38.40   | 46.14   | 72.27   |
| Negative        | 481.979 | 15.6                 | CTP                        | 26.77                                               | 23.35    | 28.24    | 55.02     | 47.61     | 56.12     | 46.39   | 47.44   | 35.53   | 38.84   | 41.45   | 17.93   | 40.75   | 25.68   | 42.24   | 15.28   | 9.30    | 12.72   | 2.16    | 1.05    | 1.45    |
| Positive        | 688.319 | 6.3                  | Deferriochromone           | 0.00                                                | 0.00     | 0.00     | 0.08      | 0.00      | 0.00      | 0.06    | 0.00    | 0.00    | 0.00    | 0.00    | 58.07   | 158.44  | 200.68  | 407.00  | 328.98  | 318.39  | 0.04    | 196.12  | 84.40   |         |
| Positive        | 203.148 | 20.6                 | Dimethyl arginine          | 3.31                                                | 4.85     | 4.42     | 4.41      | 4.84      | 3.97      | 4.82    | 4.02    | 5.32    | 16.13   | 35.36   | 15.91   | 93.89   | 74.50   | 100.03  | 91.57   | 77.28   | 80.04   | 39.81   | 48.05   | 65.43   |
| Positive        | 312.127 | 10.0                 | Dimethyl guanosine         | 55.31                                               | 59.71    | 49.16    | 3.24      | 54.04     | 37.34     | 21.42   | 55.54   | 42.38   | 58.90   | 56.30   | 50.07   | 47.09   | 37.77   | 54.88   | 16.83   | 15.78   | 15.98   | 4.78    | 2.83    | 3.49    |
| Positive        | 184.106 | 9.7                  | Dimethyl histidine         | 9.13                                                | 12.86    | 14.20    | 17.02     | 21.02     | 15.05     | 17.78   | 25.96   | 18.59   | 45.17   | 60.74   | 39.59   | 198.94  | 128.39  | 179.31  | 98.74   | 87.93   | 101.75  | 67.02   | 47.35   | 76.84   |
| Positive        | 175.142 | 19.7                 | Dimethyl lysine            | 1.16                                                | 2.11     | 1.95     | 2.39      | 1.48      | 1.23      | 1.69    | 1.49    | 1.84    | 5.11    | 9.75    | 4.16    | 25.01   | 22.29   | 32.13   | 22.05   | 19.04   | 21.03   | 8.47    | 8.76    | 10.55   |
| Positive        | 230.093 | 12.2                 | Ergothioneine              | 0.00                                                | 0.00     | 0.00     | 0.00      | 0.14      | 0.12      | 0.00    | 0.06    | 0.08    | 2.11    | 3.29    | 1.44    | 41.76   | 33.71   | 50.53   | 29.66   | 42.59   | 41.44   | 19.50   | 23.78   | 39.96   |
| Positive        | 741.230 | 4.9                  | Ferrichrome                | 25.15                                               | 29.29    | 25.33    | 35.36     | 21.11     | 35.47     | 46.50   | 33.68   | 33.59   | 97.41   | 69.28   | 79.11   | 654.57  | 265.85  | 398.58  | 548.25  | 521.61  | 473.70  | 598.75  | 373.34  | 279.24  |
| Negative        | 338.990 | 15.8                 | Fructose-1-6-diphosphate   | 558.72                                              | 598.01   | 695.81   | 4.33      | 6.28      | 7.01      | 1.88    | 2.41    | 1.95    | 2.95    | 3.34    | 1.47    | 1.46    | 0.78    | 1.41    | 0.20    | 0.14    | 0.20    | 0.11    | 0.01    | 0.00    |
| Negative        | 259.023 | 13.5                 | Fructose-6-phosphate       | 90.19                                               | 98.21    | 105.08   | 16.73     | 9.54      | 11.26     | 14.44   | 18.92   | 14.55   | 21.37   | 26.41   | 17.10   | 15.24   | 4.32    | 18.92   | 4.15    | 2.04    | 5.18    | 0.04    | 0.01    | 0.03    |
| Negative        | 604.073 | 15.5                 | GDP-glucose                | 22.23                                               | 19.45    | 22.91    | 33.94     | 27.50     | 29.51     | 34.41   | 33.92   | 26.86   | 59.60   | 61.62   | 29.54   | 23.68   | 15.84   | 21.76   | 14.98   | 10.44   | 11.62   | 0.46    | 0.33    | 0.19    |
| Negative        | 259.023 | 14.2                 | Glucose-6-phosphate        | 147.37                                              | 135.11   | 176.20   | 26.92     | 24.36     | 24.50     | 23.45   | 29.72   | 22.79   | 50.69   | 57.81   | 35.14   | 21.72   | 9.42    | 20.24   | 4.09    | 2.04    | 3.07    | 0.59    | 0.31    | 6.09    |
| Negative        | 306.077 | 12.0                 | Glutathione (GSH)          | 1.29                                                | 216.15   | 247.36   | 0.04      | 0.49      | 0.55      | 0.08    | 0.47    | 0.16    | 0.05    | 0.02    | 0.01    | 0.00    | 0.00    | 0.02    | 0.04    | 0.00    | 0.11    | 0.00    | 0.00    | 0.00    |
| Negative        | 611.148 | 15.0                 | Glutathione (GSSG)         | 228.39                                              | 197.46   | 234.10   | 324.85    | 271.83    | 283.49    | 256.25  | 290.84  | 222.89  | 246.51  | 247.69  | 161.48  | 1276.67 | 645.28  | 1056.79 | 1224.71 | 903.33  | 1005.19 | 926.82  | 579.37  | 618.12  |
| Positive        | 258.108 | 12.3                 | Glycerophosphocholine      | 936.66                                              | 1206.48  | 1359.86  | 2933.69   | 2184.49   | 2519.92   | 2344.15 | 2235.26 | 2023.03 | 1235.79 | 1917.87 | 991.26  | 1662.55 | 965.11  | 1512.50 | 1371.50 | 1070.44 | 1248.87 | 887.03  | 725.49  | 1143.95 |
| Negative        | 214.049 | 13.2                 | Glycerophosphoethanolamine | 7.81                                                | 10.12    | 14.82    | 50.22     | 26.74     | 35.99     | 51.33   | 50.25   | 36.15   | 9.13    | 8.87    | 7.01    | 8.63    | 3.70    | 5.48    | 5.95    | 3.25    | 5.70    | 2.09    | 0.82    | 1.56    |
| Negative        | 333.060 | 13.5                 | Glycerophosphoinositol     | 10.07                                               | 12.69    | 15.16    | 27.13     | 18.47     | 23.47     | 23.69   | 30.32   | 24.98   | 6.35    | 6.43    | 5.99    | 3.95    | 1.65    | 4.04    | 1.41    | 0.70    | 1.88    | 2.37    | 1.93    | 1.81    |
| Negative        | 521.985 | 16.4                 | GTP                        | 107.06                                              | 110.08   | 102.81   | 118.80    | 102.34    | 113.19    | 102.96  | 102.94  | 78.31   | 119.29  | 132.52  | 55.33   | 106.22  | 67.49   | 95.76   | 120.85  | 85.89   | 81.06   | 26.27   | 15.23   | 16.48   |
| Negative        | 267.074 | 8.4                  | Inosine                    | 24.78                                               | 24.91    | 33.14    | 52.66     | 67.73     | 69.08     | 78.50   | 119.94  | 87.30   | 103.03  | 89.13   | 92.59   | 30.47   | 21.92   | 28.13   | 0.77    | 1.01    | 1.15    | 6.50    | 4.34    | 2.50    |
| Positive        | 282.117 | 12.5                 | Methyl adenosine           | 6.53                                                | 5.72     | 6.41     | 4.64      | 4.68      | 6.33      | 6.98    | 4.81    | 4.23    | 6.53    | 19.92   | 12.84   | 233.15  | 115.20  | 133.56  | 109.15  | 136.00  | 98.53   | 68.51   | 85.48   | 130.71  |
| Positive        | 298.112 | 7.3                  | Methyl guanosine           | 3.64                                                | 10.24    | 4.77     | 4.00      | 3.23      | 4.47      | 5.64    | 3.83    | 4.11    | 7.79    | 7.03    | 12.40   | 25.55   | 63.05   | 15.21   | 11.66   | 43.33   | 49.97   | 15.31   | 13.20   | 11.89   |
| Positive        | 170.091 | 10.9                 | Methyl histidine           | 2.67                                                | 2.90     | 3.30     | 6.18      | 6.56      | 6.11      | 6.98    | 8.34    | 5.85    | 11.34   | 13.81   | 8.32    | 55.77   | 40.64   | 63.16   | 31.65   | 26.70   | 34.85   | 19.44   | 16.63   | 31.49   |
| Positive        | 664.110 | 12.0                 | NAD+                       | 382.45                                              | 381.86   | 381.69   | 340.11    | 516.66    | 669.44    | 449.07  | 577.49  | 439.65  | 459.66  | 728.43  | 312.03  | 488.87  | 375.32  | 681.77  | 401.44  | 334.48  | 404.55  | 253.29  | 243.26  | 430.33  |
| Positive        | 744.075 | 14.4                 | NADP+                      | 21.25                                               | 23.01    | 21.71    | 11.25     | 23.55     | 30.83     | 27.91   | 19.79   | 16.83   | 25.37   | 34.14   | 18.54   | 17.93   | 20.78   | 33.17   | 17.86   | 15.72   | 11.52   | 10.96   | 11.44   | 21.58   |
| Negative        | 184.986 | 14.4                 | Phospho-glyceric acid      | 304.51                                              | 263.69   | 289.63   | 88.87     | 67.79     | 80.77     | 77.57   | 90.38   | 69.64   | 126.62  | 146.41  | 81.47   | 100.98  | 44.57   | 92.01   | 13.29   | 11.20   | 11.48   | 1.11    | 1.30    | 1.41    |
| Negative        | 166.976 | 15.0                 | Phosphoenolpyruvate        | 64.98                                               | 54.36    | 66.90    | 38.88     | 20.43     | 24.75     | 31.43   | 29.31   | 24.78   | 51.11   | 59.74   | 42.04   | 27.76   | 10.90   | 23.17   | 3.57    | 2.64    | 3.37    | 0.24    | 0.28    | 0.31    |
| Positive        | 385.125 | 11.2                 | S-adenosyl-homocysteine    | 46.87                                               | 54.30    | 53.57    | 40.87     | 48.15     | 56.55     | 29.79   | 43.86   | 36.01   | 3.11    | 3.48    | 2.39    | 24.13   | 15.91   | 21.43   | 29.07   | 26.57   | 37.51   | 103.93  | 88.13   | 227.49  |
| Positive        | 399.141 | 14.4                 | S-adenosyl-methionine      | 11.43                                               | 9.64     | 9.77     | 4.24      | 18.71     | 24.20     | 37.35   | 32.54   | 30.38   | 117.47  | 99.43   | 63.79   | 567.94  | 617.49  | 717.78  | 657.23  | 546.93  | 388.44  | 175.84  | 217.71  | 311.00  |
| Negative        | 341.110 | 13.6                 | Trehalose                  | 9.63                                                | 8.55     | 10.72    | 3.25      | 1.55      | 1.92      | 6.82    | 7.38    | 6.16    | 2671.36 | 2771.58 | 2866.38 | 6711.19 | 3024.31 | 5572.18 | 5452.27 | 4511.92 | 5831.50 | 4738.15 | 4100.22 | 4860.03 |
| Positive        | 198.122 | 10.0                 | Trimethyl histidine        | 3.81                                                | 3.67     | 3.81     | 7.75      | 9.57      | 6.22      | 7.13    | 10.69   | 6.82    | 21.40   | 23.68   | 14.91   | 220.04  | 147.15  | 223.53  | 152.87  | 143.41  | 173.67  | 158.44  | 102.26  | 164.18  |
| Positive        | 189.158 | 21.1                 | Trimethyl lysine           | 1.70                                                | 2.83     | 2.48     | 2.49      | 1.16      | 1.20      | 1.21    | 1.31    | 1.35    | 5.76    | 11.92   | 5.77    | 41.13   | 41.02   | 53.14   | 44.74   | 41.32   | 43.56   | 20.63   | 23.90   | 26.51   |
| Negative        | 606.077 | 12.8                 | UDP-acetyl-glucosamine     | 10.80                                               | 12.92    | 12.98    | 50.27     | 19.50     | 24.98     | 27.49   | 12.59   | 8.47    | 37.85   | 30.44   | 21.13   | 29.88   | 20.82   | 39.35   | 26.69   | 16.79   | 21.81   | 12.55   | 13.08   | 13.04   |
| Negative        | 565.050 | 13.8                 | UDP-glucose                | 358.59                                              | 345.88   | 351.00   | 272.39    | 224.03    | 290.23    | 343.32  | 308.05  | 236.39  | 527.33  | 401.32  | 368.92  | 297.74  | 198.46  | 265.00  | 119.95  | 83.23   | 112.55  | 1.15    | 1.21    | 0.95    |
| Negative        | 482.963 | 15.1                 | UTP                        | 94.25                                               | 109.20   | 122.71   | 69.04     | 63.44     | 78.19     | 54.59   | 48.98   | 36.82   | 72.94   | 76.14   | 39.95   | 118.25  | 65.74   | 133.93  | 46.42   | 37.43   | 37.32   | 26.91   | 16.50   | 24.57   |
| Negative        | 283.069 | 9.5                  | Xanthosine                 | 4.74                                                | 5.20     | 5.09     | 2.33      | 2.97      | 2.83      | 1.70    | 2.25    | 1.35    | 13.45   | 12.76   | 11.09   | 12.69   | 9.75    | 9.94    | 0.42    | 0.60    | 0.44    | 1.33    | 1.21    | 1.42    |

**Table S3** The time-course change in peak areas of metabolites under glucose starvation. *S. pombe* cells grown at 26°C in medium containing 111 mM glucose were transferred to 1.1-mM glucose medium for 7 days. Metabolites were extracted at the indicated times, three samples at each time point.

**Movie S1** Cells after shifting to the *fasting* condition (0 mM glucose)

The removal of glucose causes organelles standstill and eventual cell death. Significant changes in cytoplasmic features were observed after 6 h of fasting, although cell viability remained high. Cell death occurred after the arrest of gross intracellular organelles movement and the exhaustion of ATP.

**Movie S2** Cells after shifting to the *starvation* condition (1.1 mM glucose)

In medium containing 1.1 mM glucose, the organelles movement was active like in cells cultured in standard EMM2 medium (111 mM glucose; see Movie S7), based on the rates of their intracellular movements, but the cells divided infrequently, suggesting that the 1/100-reduced glucose concentration of the standard medium was sufficient to sustain the organelles movement, but barely sufficient for cell division.

**Movie S3** Cells after shifting to the *sub-starvation* condition (1.7 mM glucose)

**Movie S4** Cells after shifting to the *severe diet* condition (2.2 mM glucose)

**Movie S5** Cells after shifting to the *diet* condition (4.4 mM glucose)

When cultivated in 4.4 mM glucose, cells divided regularly with doubling time only slightly longer than that in 111 mM glucose (see text), but cell length was significantly shorter.

**Movie S6** Cells after shifting to the *regular* glucose condition (11.1 mM glucose)

Cells were long and rod-shaped, and cell division was normal when cells were cultivated in 11.1 mM glucose.

**Movie S7** Cells grown in culture containing *excess* (111 mM) glucose

The glucose concentration in the standard EMM2 recipe is 111 mM.
